# Supplementary material
Source: Springer Nature journal article supplement (https://www.springermedizin.de/resource/supplementary/12888_2013_1364_MOESM4_ESM.pdf/9479998)

**Figure 3: Summary of systematic search presented as an adapted CONSORT diagram**

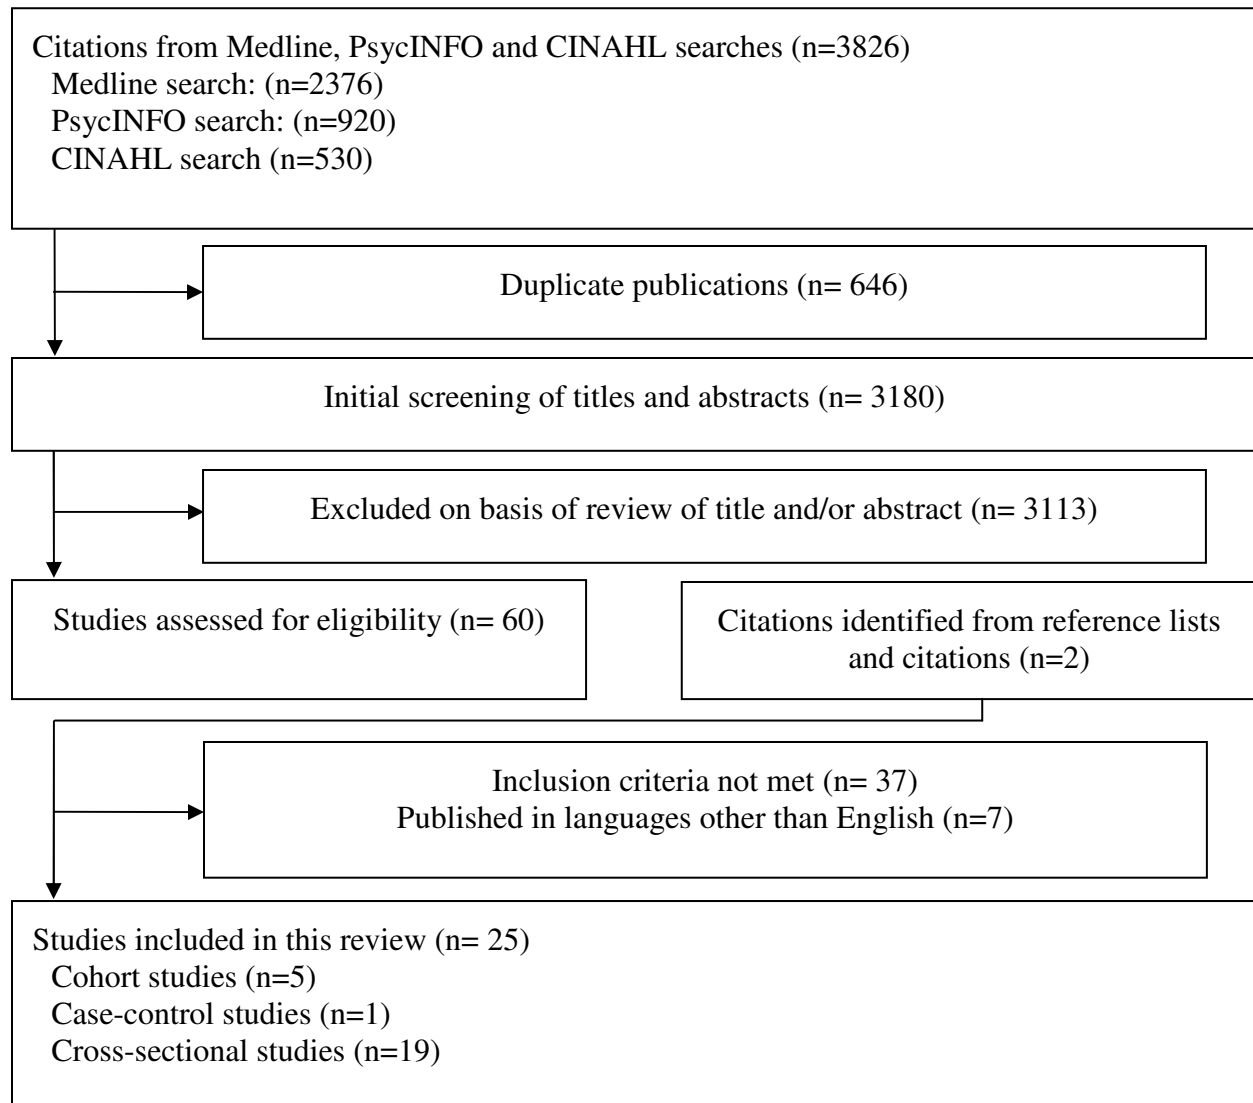

Supplement: MOESM4 [file 9479998]
